# Supplementary material
Source: publisher site journal article supplement (https://www.dovepress.com/article/284092)
Supplement: Supplementary file 1 [file get_supplementary_file.php]

**
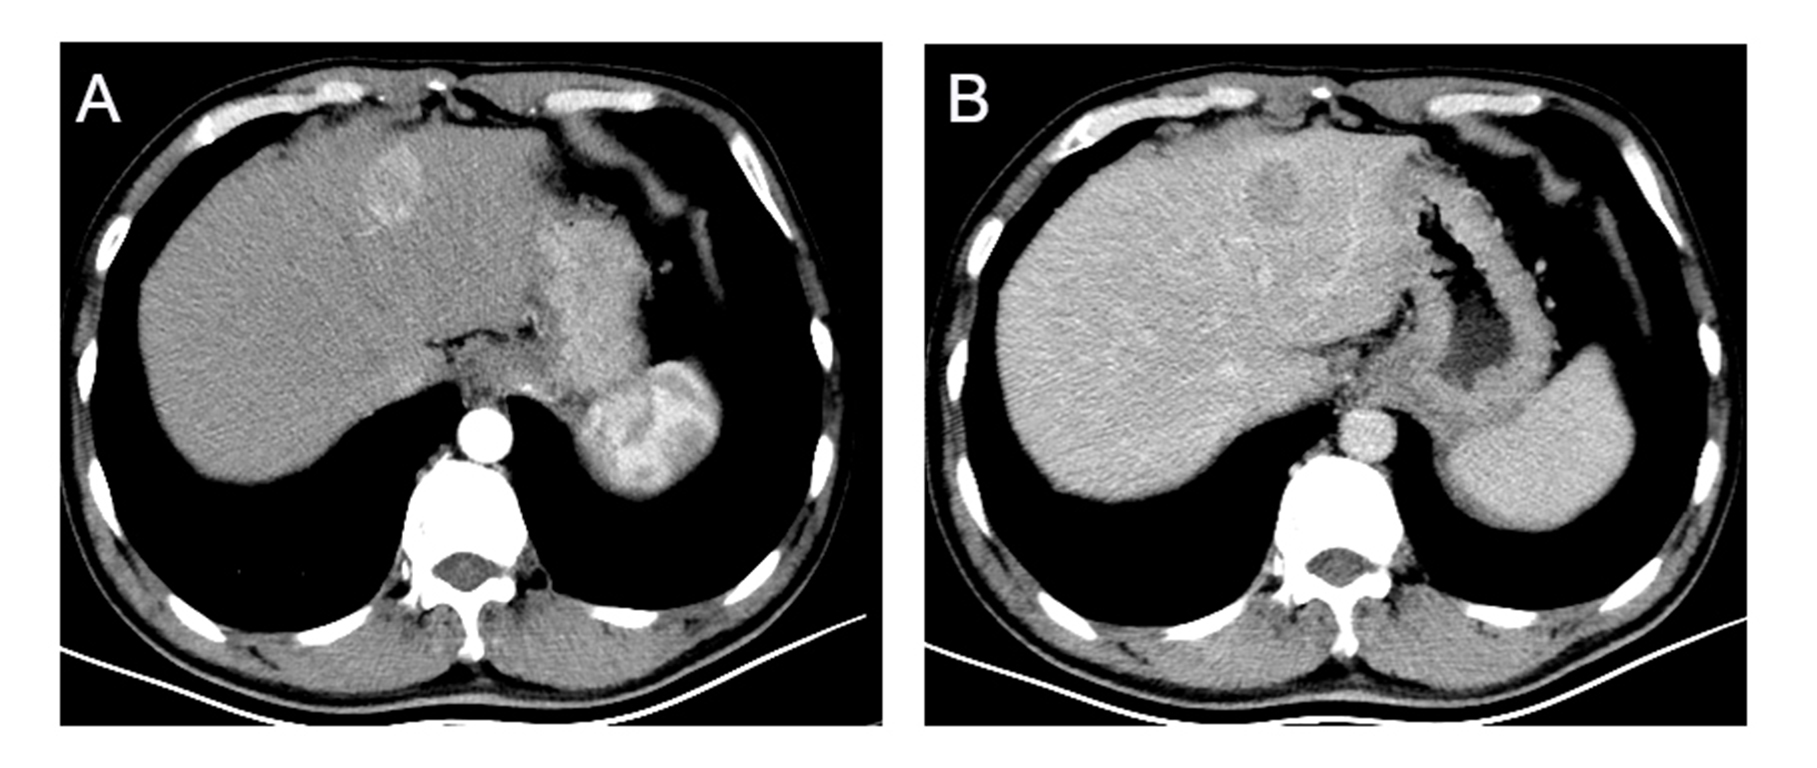
**

**Supplemental Figure 1.** Enhanced abdominal CT scan shows a heterogeneous irregular mass measuring up to 2.3*2.2cm with arterial phase enhancement **(A)** and venous phase washout **(B)**.
